# Supplementary material for: Effects of inorganic and organic fertilizers on CO2 and CH4 fluxes from tea plantation soil
Source: Oxford University Press journal article supplement (doi:10.1525/elementa.2021.090), 2021-01-01
Supplement: data1-co2_emission.xlsx [file data1-co2_emission.xlsx]

## Sheet: CO2
CO2 flux (mg kg-1h-1 )
Incubation time (day)	CK	N	R	NR1(2:1)	NR2(1:2)
1	0.691967	1.43337	1.82442	1.60183	1.49212
3	0.772903	0.803622	1.42233	2.09976	1.77885
4	0.37341	0.42431	1.24498	0.754561	1.08389
5	0.352085	0.344576	1.12732	0.602231	0.698469
6	0.383905	0.352389	1.04744	0.439092	0.847766
7	0.304007	0.342746	0.854307	0.418271	0.701257
9	0.513829	0.422771	0.823391	0.643776	0.703996
10	0.3899	0.439978	0.831951	0.573268	0.807729
12	0.379617	0.369895	0.580175	0.4765	0.609537
13	0.315036	0.326325	0.572776	0.381108	0.546713
16	0.371042	0.294323	0.575542	0.376293	0.497723
19	0.354796	0.322148	0.484963	0.357274	0.49087
22	0.342963	0.336694	0.488394	0.373516	0.45524
27	0.263623	0.289714	0.264012	0.273729	0.359433
35	0.26	0.265411	0.342007	0.300863	0.338964
41	0.245912	0.215563	0.30365	0.34433	0.280242
46	0.283462	0.269046	0.32908	0.30691	0.345761
50	0.295373	0.265144	0.317232	0.279974	0.307827
CO2 cumulative emissions (mg kg-1)
Incubation time (day)	CK	N	R	NR1(2:1)	NR2(1:2)
1	16.6072	33.9148	43.7861	36.6197	39.1085
3	52.7353	79.8025	116.883	133.28	119.997
4	65.6261	89.986	146.763	151.389	147.377
5	74.0762	98.2558	173.818	165.843	162.139
6	83.2899	106.713	198.957	177.718	182.485
7	90.586	114.939	219.46	187.756	199.316
9	119.047	136.373	259.354	215.951	233.075
10	127.657	146.932	279.321	226.517	252.46
12	133.684	165.528	310.191	248.954	284.096
13	140.825	173.36	323.937	258.101	292.227
16	165.906	195.319	365.31	285.309	324.249
19	191.756	217.846	402.401	311.49	359.756
22	216.334	241.739	437.483	337.993	393.389
27	248.407	278.759	479.935	375.63	441.119
35	291.183	331.76	539.049	431.117	507.92
41	323.063	365.792	585.076	478.092	551.798
46	351.834	390.919	623.345	516.718	590.145
50	377.291	414.218	654.226	544.565	621.062
