# Supplementary material for: Effects of inorganic and organic fertilizers on CO2 and CH4 fluxes from tea plantation soil
Source: Oxford University Press journal article supplement (doi:10.1525/elementa.2021.090), 2021-01-01
Supplement: data2-ch4_emission.xlsx [file data2-ch4_emission.xlsx]

## Sheet: CH4
CH4 flux (ng kg-1h-1 )
Incubation time (day)	CK	N	R	NR1(2:1)	NR2(1:2)
1	-40.4873	6.86225	-34.3112	-38.8861	-43.4609
3	2.38757	-8.3565	-2.38757	-9.55029	-7.16271
4	-6.73466	-4.48978	-20.204	-4.48978	-13.4693
5	-20.204	-20.204	-20.204	-15.7142	-35.9182
6	-9.79942	-2.44986	9.79942	-4.89971	9.79942
7	-33.3789	-26.2262	-47.6841	-28.6104	-11.921
9	-11.2693	-13.5232	-38.3157	-16.904	-15.7771
10	-39.4195	-34.7819	-27.8255	-55.651	-13.9128
12	2.34778	-2.34778	9.39111	11.7389	9.39111
13	-2.40798	-4.81596	-12.0399	-2.40798	-2.40798
16	-4.19612	4.19612	-0.466235	-0.466235	-3.26365
19	-1.25401	-5.01603	2.50801	10.0321	25.0801
22	-6.82531	-6.82531	-6.82531	-29.5763	-20.4759
27	4.86446	-2.43223	4.86446	12.1612	23.1062
35	-9.01891	-25.7683	-23.1915	-7.73049	-5.15366
41	-5.02348	8.79109	5.02348	12.5587	20.0939
46	2.5651	17.9557	20.5208	25.651	23.0859
50	2.44278	9.7711	4.88555	2.44278	14.6567
CH4 cumulative emissions (µg kg-1)
Incubation time (day)	CK	N	R	NR1(2:1)	NR2(1:2)
1	-1.64694	-0.905817	-0.82347	-0.933266	-1.15286
3	-2.64231	-1.79493	-1.27818	-1.74371	-2.03012
4	-2.66925	-1.98351	-1.79002	-1.85146	-2.46114
5	-3.2619	-2.41452	-2.38267	-2.2286	-3.37705
6	-3.58528	-2.56151	-2.00049	-2.3462	-3.17127
7	-4.30055	-3.01928	-2.71575	-3.03285	-3.28571
9	-4.90159	-2.03108	-4.65559	-2.4025	-3.82976
10	-5.40245	-3.0328	-5.32341	-2.79206	-4.16367
12	-5.61062	-3.4914	-5.36149	-2.56424	-4.0348
13	-5.69731	-3.66477	-5.62156	-2.62203	-4.20818
16	-6.23158	-3.61435	-5.92638	-2.7022	-4.62772
19	-6.51557	-5.18784	-6.91183	-0.787237	-3.54696
22	-7.20089	-6.35815	-9.03144	-1.24382	-3.92788
27	-7.2432	-6.86088	-10.8446	-1.78788	-5.34853
35	-7.50217	-10.5439	-13.6928	-1.60124	-6.41589
41	-8.25429	-13.3205	-15.0561	-1.01014	-5.03722
46	-8.37485	-12.6946	-13.6106	1.43955	-2.41053
50	-8.155	-11.481	-12.6982	2.50955	-0.700041
