# Supplementary material for: Effects of inorganic and organic fertilizers on CO2 and CH4 fluxes from tea plantation soil
Source: Oxford University Press journal article supplement (doi:10.1525/elementa.2021.090), 2021-01-01
Supplement: data3-soil_property.xlsx [file data3-soil_property.xlsx]

## Sheet: soil property
NH4+-N				NO3--N				DOC				MBC				pH
Incubation time (day)	Treament	Average (mg/kg)		Incubation time (day)	Treament	Average (mg/kg)		Incubation time (day)	Treament	Average (mg/kg)		Incubation time (day)	Treament	Average (mg/kg)		Incubation time (day)	Treament	Average (mg/kg)
1	CK	24.6129		1	CK	10.8728		1	CK	43.9849		1	CK	48.9682		1	CK	4.56667
1	N	74.9531		1	N	8.71921		1	N	55.4493		1	N	25.1443		1	N	4.85333
1	R	15.6493		1	R	8.11179		1	R	48.7738		1	R	88.4848		1	R	4.64333
1	NR1	67.9951		1	NR1	9.38185		1	NR1	50.83		1	NR1	31.9119		1	NR1	4.80667
1	NR2	46.6011		1	NR2	8.38789		1	NR2	45.9052		1	NR2	76.4285		1	NR2	4.71333
3	CK	16.8446		3	CK	7.93877		3	CK	33.3905		3	CK	10.4618		3	CK	4.55
3	N	103.501		3	N	9.18451		3	N	40.2112		3	N	47.4458		3	N	5.05
3	R	12.9712		3	R	7.14603		3	R	168.276		3	R	87.4747		3	R	4.69333
3	NR1	76.2379		3	NR1	7.48578		3	NR1	63.2428		3	NR1	64.7907		3	NR1	4.94
3	NR2	43.7107		3	NR2	6.8629		3	NR2	97.3137		3	NR2	68.0014		3	NR2	4.80667
7	CK	19.2347		7	CK	11.3511		7	CK	28.3433		7	CK	31.924		7	CK	4.505
7	N	110.376		7	N	13.1654		7	N	24.1833		7	N	37.0274		7	N	4.9
7	R	35.4013		7	R	11.3794		7	R	152.925		7	R	81.0172		7	R	4.84667
7	NR1	86.624		7	NR1	12.3149		7	NR1	56.3767		7	NR1	54.733		7	NR1	4.95667
7	NR2	58.6667		7	NR2	11.4078		7	NR2	87.6005		7	NR2	62.4049		7	NR2	4.91333
13	CK	17.5798		13	CK	17.9862		13	CK	14.313		13	CK	42.7056		13	CK	4.24
13	N	110.027		13	N	24.4798		13	N	17.6562		13	N	42.1356		13	N	4.54
13	R	53.6875		13	R	11.2687		13	R	53.5687		13	R	63.6363		13	R	4.68667
13	NR1	99.718		13	NR1	18.9379		13	NR1	30.8425		13	NR1	44.656		13	NR1	4.50333
13	NR2	83.2352		13	NR2	14.6274		13	NR2	35.1997		13	NR2	45.392		13	NR2	4.52
22	CK	20.7418		22	CK	21.6816		22	CK	14.2762		22	CK	21.5296		22	CK	4.27
22	N	93.7422		22	N	42.5259		22	N	15.5068		22	N	24.6609		22	N	4.36
22	R	59.14		22	R	15.5055		22	R	51.1117		22	R	48.7662		22	R	4.32333
22	NR1	83.6438		22	NR1	35.5778		22	NR1	28.6282		22	NR1	28.3261		22	NR1	4.51667
22	NR2	81.2348		22	NR2	24.5915		22	NR2	37.7932		22	NR2	33.7758		22	NR2	4.505
41	CK	25.6212		41	CK	38.7793		41	CK	12.7617		41	CK	20.3559		41	CK	4.28333
41	N	71.0921		41	N	86.9151		41	N	12.9458		41	N	22.6767		41	N	4.19667
41	R	59.7771		41	R	46.7991		41	R	47.5117		41	R	26.4502		41	R	4.40667
41	NR1	68.9021		41	NR1	73.9942		41	NR1	27.4842		41	NR1	23.5498		41	NR1	4.25
41	NR2	74.9855		41	NR2	55.2367		41	NR2	33.5898		41	NR2	26.7725		41	NR2	4.32667
50	CK	20.5123		50	CK	40.4222		50	CK	11.8517		50	CK	18.6628		50	CK	4.29
50	N	89.1101		50	N	91.2019		50	N	13.2557		50	N	22.3665		50	N	4.12
50	R	65.953		50	R	51.9217		50	R	47.0167		50	R	25.974		50	R	4.45
50	NR1	81.5327		50	NR1	87.217		50	NR1	26.1647		50	NR1	21.3901		50	NR1	4.22333
50	NR2	79.1957		50	NR2	75.6037		50	NR2	33.0503		50	NR2	21.5344		50	NR2	4.27333
